# Supplementary material for: Novel metallated imidazole phthalocyanines: synthesis, ultrafast excited-state carrier dynamics and multiphoton absorption properties
Source: Royal Society of Chemistry journal article supplement (doi:10.1039/d3ma00225j), 2023-01-01
Supplement: d3ma00225j1.pdf [file d3ma00225j1.pdf]

**Supporting Information**

**Novel Metallated Imidazole Phthalocyanines:  
Synthesis, Ultrafast Excited State Carrier  
Dynamics and Multiphoton Absorption  
Properties**

**Md Soif Ahmed,<sup>a</sup> Kalavala Shivaprakash Srivishnu,<sup>b,c</sup> Chinmoy Biswas,<sup>a</sup>  
Prabhakar Chetti,<sup>d</sup> Venugopal Rao Soma,<sup>e</sup> Lingamallu Giribabu,<sup>b,c\*</sup> Sai  
Santosh Kumar Raavi<sup>a, f\*</sup>**

<sup>a</sup> *Ultrafast Photophysics and Photonics Laboratory, Department of Physics, Indian Institute of Technology Hyderabad, Kandi 502285, Telangana, India*

<sup>b</sup> *Polymers & Functional Materials Division, CSIR-Indian Institute of Chemical Technology, Tarnaka, Hyderabad-500007, India*

<sup>c</sup> *Academy of Scientific and Innovative Research (AcSIR), Ghaziabad- 201002, India*

<sup>d</sup> *Department of Chemistry, National Institute of Technology, Kurukshetra 136119, India*

<sup>e</sup> *Advanced Centre of Research in High Energy Materials (ACRHEM), DRDO Industry Academia – Centre of Excellence (DIA-COE), University of Hyderabad, Hyderabad 500046, Telangana, India*

<sup>f</sup> *Department of Climate Change, Indian Institute of Technology Hyderabad, Kandi 502285, Telangana, India*

*Corresponding author's e-mail addresses: [sskraavi@phy.iith.ac.in](mailto:sskraavi@phy.iith.ac.in) and [giribabu@iict.res.in](mailto:giribabu@iict.res.in)*

## Absorption and photoluminescence

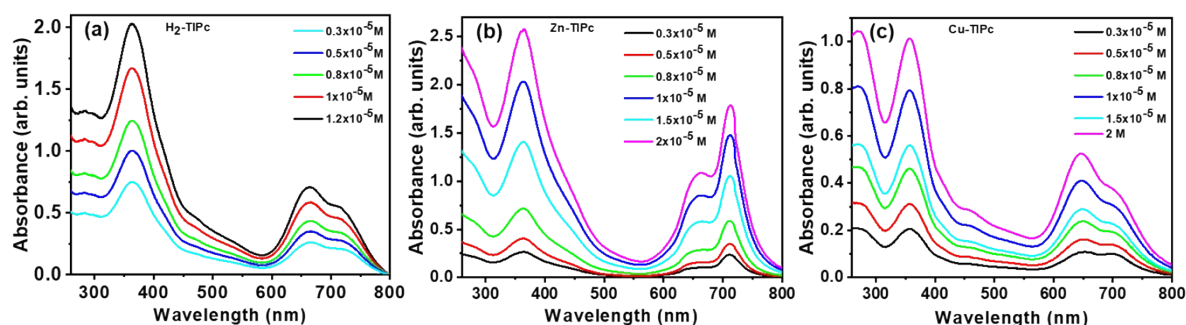

**Fig. S1.** Absorption spectral changes of (a) H<sub>2</sub>-TIPc, (b) Zn-TIPc and (c) Cu-TIPc in DCM at different concentrations.

## Time-resolved photoluminescence

Excitation laser wavelength: ~ 640 nm.

TRPL is measured at emission wavelength of 720 nm.

**Table S1**

PL decay parameters of the samples obtained by TCSPC. Residuals ( $\chi^2$ ), bi-exponential decay time fit parameters  $\tau_1$  and  $\tau_2$  with respective % (Rel. %) are presented here.

| Sample               | $\tau_1$ (ns) | Rel. % | $\tau_2$ (ns) | Rel. % | $\chi^2$ |
|----------------------|---------------|--------|---------------|--------|----------|
| H <sub>2</sub> -TIPc | 1.88          | 11.61  | <b>4.97</b>   | 88.39  | 1.06     |
| Zn-TIPc              | <b>2.30</b>   | 92.88  | 5.71          | 7.12   | 1.13     |

**Model used to fit the time-resolved photoluminescence (TRPL) using exponential reconvolution with instrument response function (IRF):**

**Fitting equation:**

$$A + B1 \exp\left(-\frac{t}{\tau_1}\right) + B2 \exp\left(-\frac{t}{\tau_2}\right); \text{ for bi-exponential decay}$$

### Details of TCSPC fitting parameters and values:

#### ▪ H<sub>2</sub>-TIPc

Time Calibration : 0.098 ns/ch

Total Experiment Time : 249.25 s

Fit Range (ch) : 107 to 512

| <u>Parameter</u> | <u>Value</u> | <u>Std. Dev.</u> | <u>Rel %</u> |
|------------------|--------------|------------------|--------------|
| $\tau_1$         | 1.882E-009 s | 1.4134E-010 s    |              |
| $\tau_2$         | 4.968E-009 s | 4.2755E-011 s    |              |
| Shift            | 2.012E-011 s | 4.532E-011 s     |              |
| B1               | 0.037        | 0.0021           | 11.61        |
| B2               | 0.108        | 0.0025           | 88.39        |
| A                | 78.619       |                  |              |
| $\chi^2$         | 1.062        |                  |              |

#### ▪ Zn-TIPc

Time Calibration : 0.098 ns/ch

Total Experiment Time : 147.01 s

Fit Range (ch) : 108 to 512

| <u>Parameter</u> | <u>Value</u> | <u>Std. Dev.</u> | <u>Rel %</u> |
|------------------|--------------|------------------|--------------|
| $\tau_1$         | 2.304E-009 s | 2.4933E-011 s    |              |
| $\tau_2$         | 5.708E-009 s | 6.7885E-010 s    |              |
| Shift            | 9.967E-011 s | 8.441E-011 s     |              |
| B1               | 0.162        | 0.0055           | 92.88        |
| B2               | 0.005        | 0.0017           | 7.12         |
| A                | 45.218       |                  |              |
| $\chi^2$         | 1.135        |                  |              |

---

## Electrochemical and spectroelectrochemical studies

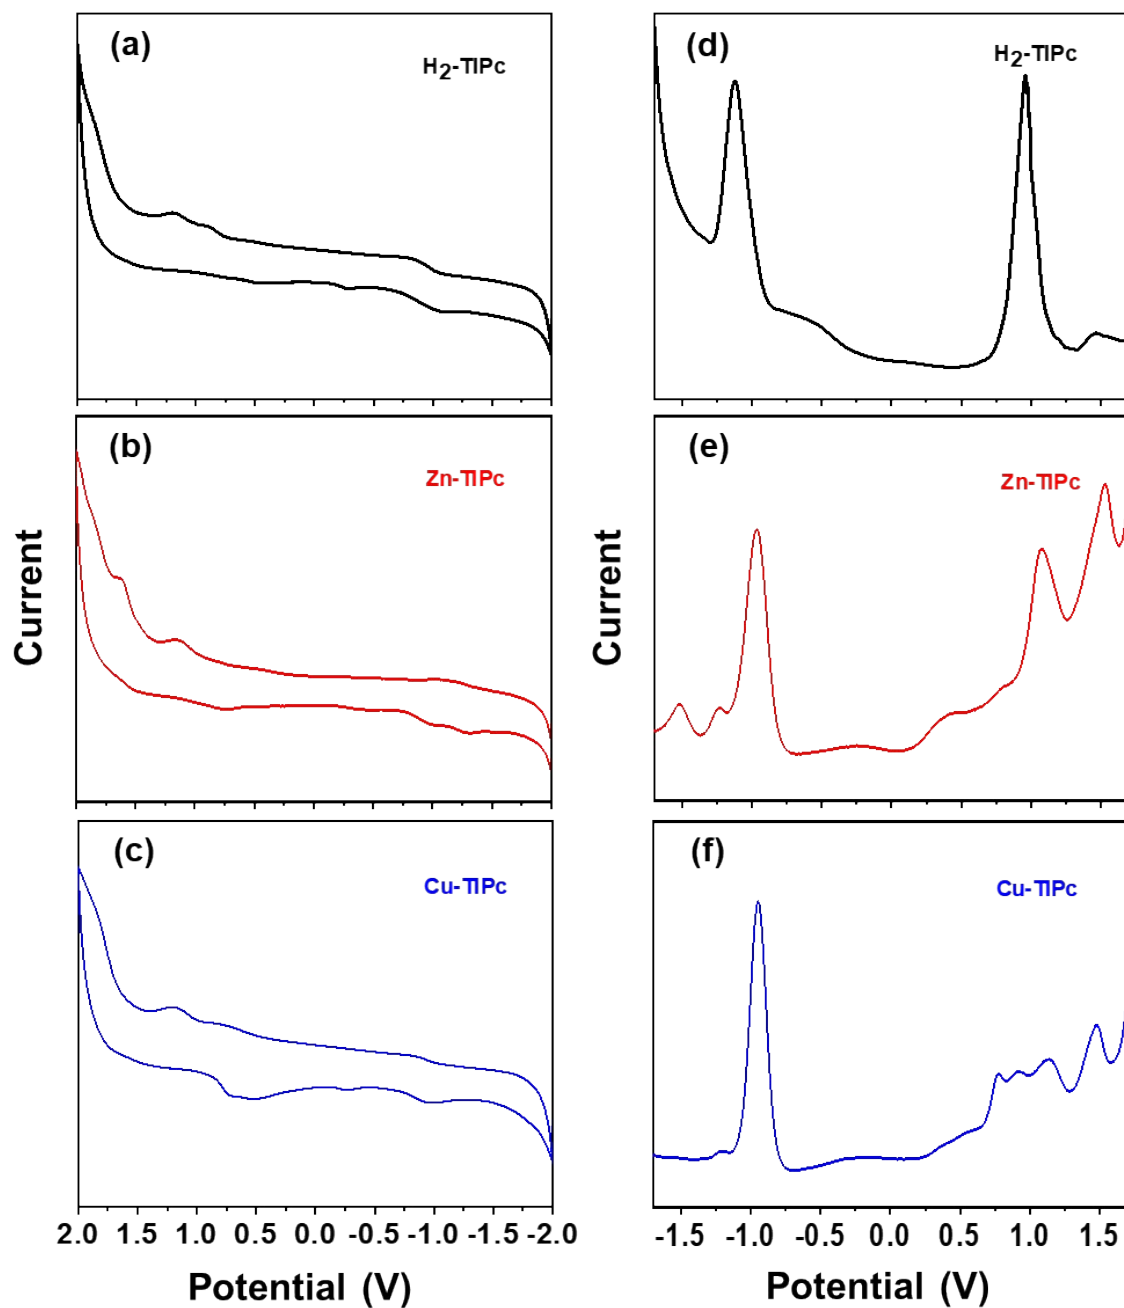

**Fig. S2.** Cyclic voltammograms of (a) H<sub>2</sub>-TIPc, (b) Zn-TIPc and (c) Cu-TIPc; differential pulse voltammetry (DPV) curves of (d) H<sub>2</sub>-TIPc, (e) Zn-TIPc and (f) Cu-TIPc.

## DFT Studies

**Table S2**

Ground ( $S_0$ ) and excited ( $S_1$ ) state geometries obtained at B3LYP/6-31G (d, p) and TD-B3LYP/6-31G (d, p) in combination with LANL2DZ, respectively.

| Molecules            | Ground ( $S_0$ ) Optimized Structure                                                | Excited ( $S_1$ ) Optimized Structure                                                |
|----------------------|-------------------------------------------------------------------------------------|--------------------------------------------------------------------------------------|
| H <sub>2</sub> -TIPc | 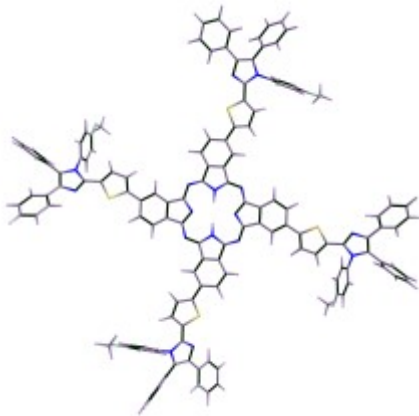  |   |
| Zn-TIPc              |  |  |
| Cu-TIPc              |  |  |

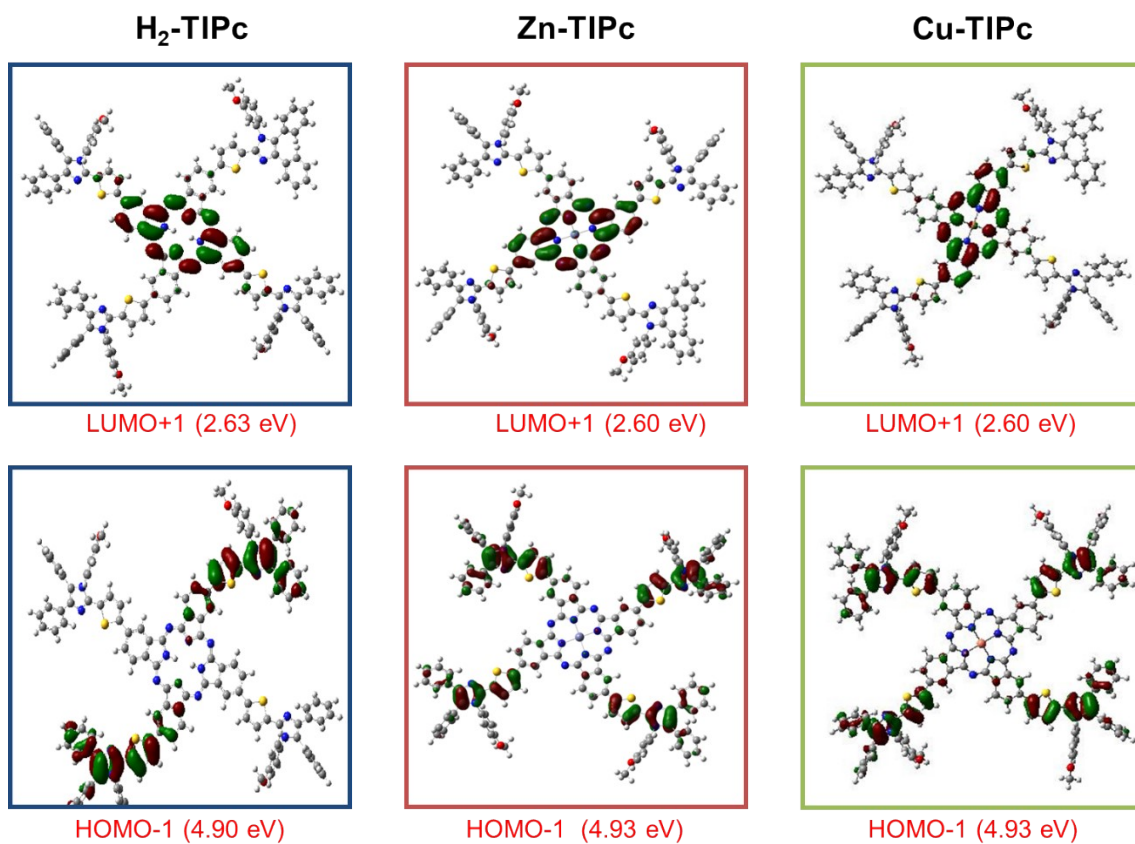

**Fig. S3.** Isodensity plots of the FMOs (HOMO-1 and LUMO+1) based on the B3LYP 6-31G(d,p) method for H<sub>2</sub>-TIPc, Zn-TIPc and Cu-TIPc.

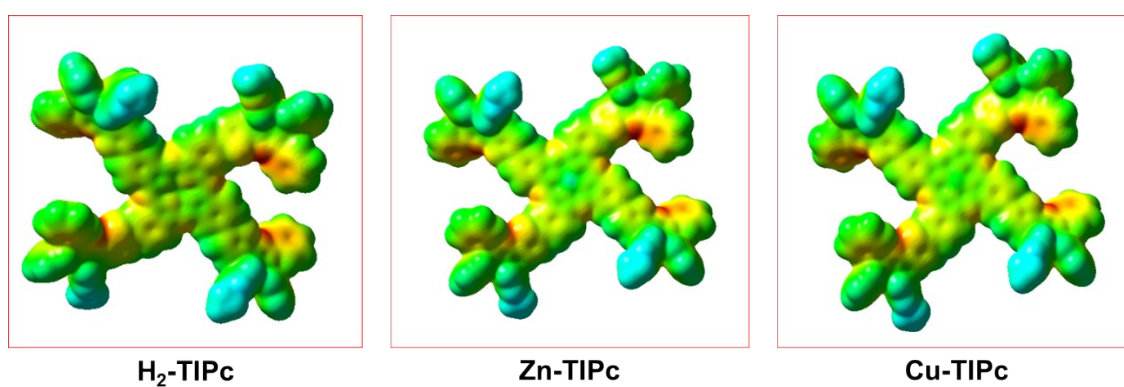

**Fig. S4.** ESP images of H<sub>2</sub>-TIPc, Zn-TIPc and Cu-TIPc, obtained from DFT.

## Transient absorption spectroscopy

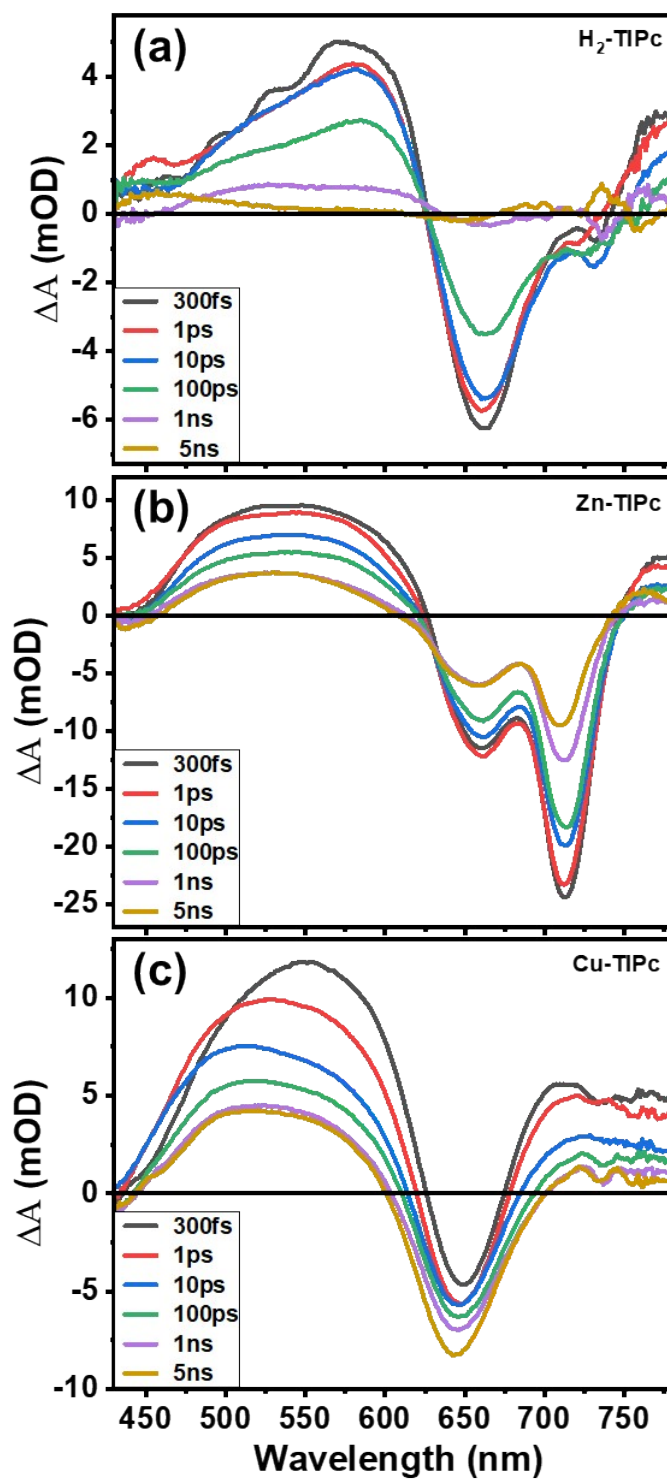

**Fig. S5.** fs-transient absorption spectra with different delay time collected with Soret band photoexcitation for (a) H<sub>2</sub>-TIPc, (b) Zn-TIPc and (c) Cu-TIPc.

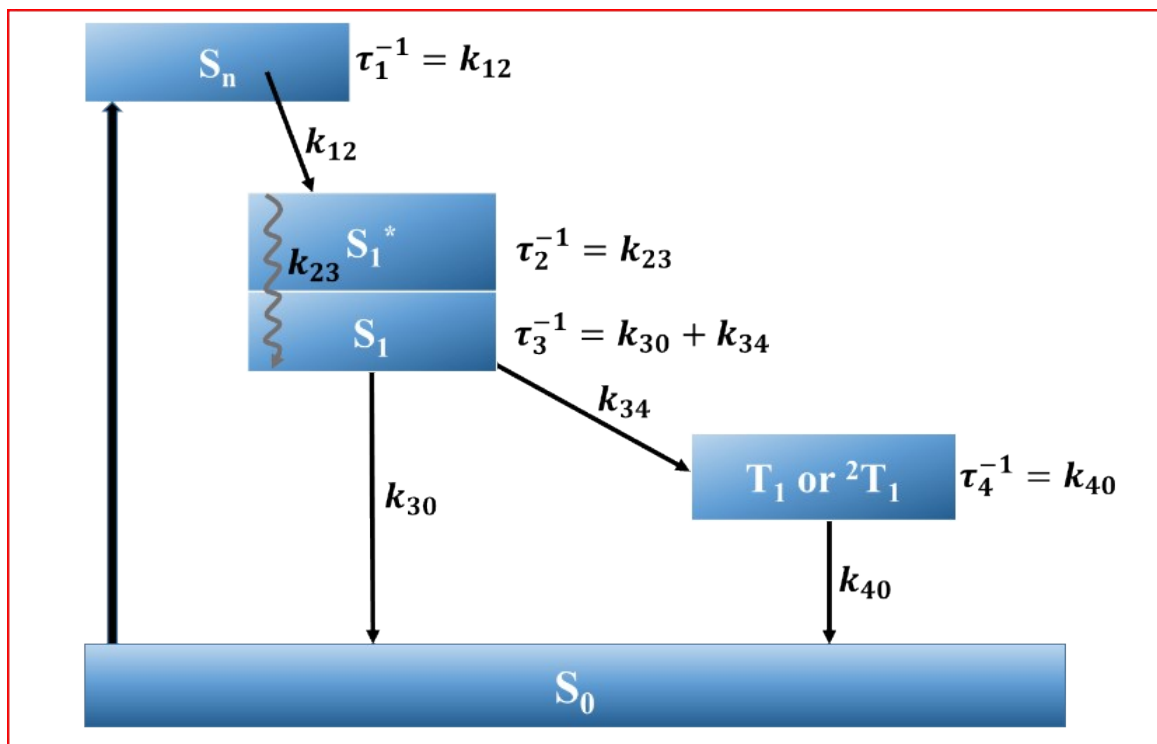

**Fig. S6.** Schematic of the photophysical model used in the target analysis of TAS data.

## Z-scan

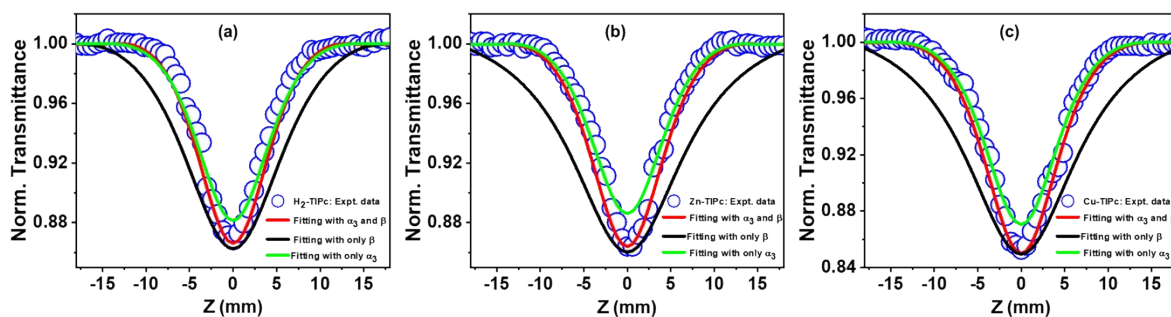

**Fig. S7.** OA Z-scan data theoretically fitted with  $\beta$ ,  $\alpha_3$  and combination of  $\beta$  and  $\alpha_3$  for (a) H<sub>2</sub>-TIPc, (b) Zn-TIPc and (c) Cu-TIPc.

Equation for calculating 2PA cross-section <sup>1</sup>:

$$\sigma_{2PA} = \frac{\hbar\omega}{N} \beta \quad (S1)$$



Equation for calculating 3PA cross-section<sup>1</sup>:

$$\sigma_{3PA} = \frac{(\hbar\omega)^2}{N} \alpha_3 \quad (S2)$$

where N is the number density of molecule in solution samples,  $\alpha_3$  is the 3PA coefficient.

Equation for theoretical fit of closed aperture Z-scan data<sup>2</sup>:

$$T_{CA}(x) = 1 + \frac{4x\Delta\Phi}{(1+x^2)(9+x^2)} + \frac{4(3x^2-5)\Delta\Phi^2}{(1+x^2)(9+x^2)(25+x^2)} + \dots \quad (S3)$$

Here,  $T_{CA}(x)$  is the normalised transmittance,  $x = -z/z_0$ ,  $z$  is the sample's longitudinal distance from the focus point ( $z=0$ ),  $z_0$  is the Raleigh range and  $\Delta\Phi$  is the on-axis nonlinear phase shift.

The relationship<sup>3</sup> that was utilised to determine  $\langle\gamma\rangle$ :

$$\langle\gamma\rangle = \frac{\chi^{(3)}}{NL^4}, \quad (S4)$$

where  $\chi^{(3)}$  is the third-order nonlinear susceptibility, N is the number density of molecule in

solution samples, and the local field factor is  $L = \frac{n_0^2 + 2}{3}$ .

**Table S3**

Comparison the values of obtained second hyperpolarizability with the prior reports.

| Compound                                  | Laser parameters<br>(used method) | $\gamma(esu)$                 | References   |
|-------------------------------------------|-----------------------------------|-------------------------------|--------------|
| H <sub>2</sub> -TIPc, Zn-TIPc,<br>Cu-TIPc | ~70 fs, 800 nm (Z-<br>scan)       | (2.34-3.61)×10 <sup>-30</sup> | Present work |
| Phthalocyanine,<br>ZnPc                   | ns laser, 532 nm, 10 Hz           | 2.97×10 <sup>-31</sup>        | 4            |

|                                                               |                                                     |                                                     |    |
|---------------------------------------------------------------|-----------------------------------------------------|-----------------------------------------------------|----|
| Th-Fb, Th-Cu and Th-Zn                                        | ~70 fs, 800 nm (Z-scan)                             | $1.23-2.42 \times 10^{-31}$                         | 5  |
| Quinoxalines                                                  | ~70 fs, 800 nm (degenerate four wave mixing (DFWM)) | $\sim 10^{-31}$                                     | 6  |
| uGFPc                                                         | ~70 fs, 800 nm (Z-scan)                             | $(2.17 - 6.07) \times 10^{-33}$                     | 2  |
| Orthogonal pyrrolotetrathiafulvalene derivatives (S1, S2, S3) | 30 ps, 532 nm (Z-scan)                              | $\sim 10^{-31}$                                     | 7  |
| NLOphoric mono-azo dyes                                       | (DFT, Solvatochromism)                              | $\sim 10^{-33}$ , $\sim 10^{-34}$ , $\sim 10^{-35}$ | 8  |
| Croconate dyes                                                | 100 fs, 800 nm (DFWM)                               | $-2.4$ to $-5.3 \times 10^{-32}$                    | 9  |
| Squaraine Dyes                                                | 210 fs and 3 ps; 696 and 710 nm (DFWM)              | $\sim 8 \times 10^{-32}$                            | 10 |
| Methyl orange dyes (azo dyes)                                 | (Monte Carlo/DFT)                                   | $\sim 10^{-34}$                                     | 11 |
| Azo dye                                                       | 5 ns, 532 nm (Z-scan)                               | $\sim 10^{-35}$                                     | 12 |
| HMB                                                           | (Z-scan)                                            | $0.5 \times 10^{-35}$                               | 13 |

## References

1. S. V. Rao, K. N. Krishnakanth, C. Indumathi and T. S. Girisun, in *Handbook of Laser Technology and Applications*, CRC Press, 2021, pp. 255-287.
2. M. S. Ahmed, C. Biswas, D. Banerjee, P. Chetti, J.-S. Yang, V. R. Soma and S. S. K. Raavi, Femtosecond Third-Order Non-Linear Optical Properties of Unconstrained Green Fluorescence Protein Chromophores, *Frontiers in Physics*, 2022, 549.
3. C. Biswas, N. K. Katturi, N. Duvva, L. Giribabu, V. R. Soma and S. S. K. Raavi, Multistep electron injection dynamics and optical nonlinearity investigations of  $\pi$ -extended thioalkyl-substituted tetrathiafulvalene sensitizers, *The Journal of Physical Chemistry C*, 2020, **124**, 24039-24051.
4. J. Britton, A. G. Martynov, D. O. Oluwole, Y. G. Gorbunova, A. Y. Tsivadze and T. Nyokong, Improvement of nonlinear optical properties of phthalocyanine bearing diethyleneglycole chains: Influence of symmetry lowering vs. heavy atom effect, *Journal of Porphyrins and Phthalocyanines*, 2016, **20**, 1296-1305.

5. M. S. Ahmed, C. Biswas, B. Bhavani, S. Prasanthkumar, D. Banerjee, V. Kumar, P. Chetti, L. Giribabu, V. R. Soma and S. S. K. Raavi, Metalated porphyrin-naphthalimide based donor-acceptor systems with long-lived triplet states and effective three-photon absorption, *Journal of Photochemistry and Photobiology A: Chemistry*, 2023, **435**, 114324.
6. C. Biswas, K. Krishnakanth, J. Lade, A. Chaskar, A. Tripathi, P. Chetti, V. R. Soma and S. S. K. Raavi, Linear and femtosecond nonlinear optical properties of soluble pyrrolo [1, 2-a] quinoxalines, *Chemical Physics Letters*, 2019, **730**, 638-642.
7. K. Iliopoulos, R. Czapliski, H. El Ouazzani, J.-Y. Balandier, M. Chas, S. Goeb, M. Sallé, D. Gindre and B. Sahraoui, Physical origin of the third order nonlinear optical response of orthogonal pyrrolo-tetrathiafulvalene derivatives, *Applied physics letters*, 2010, **97**, 101104.
8. U. Warde and N. Sekar, NLOphoric mono-azo dyes with negative solvatochromism and in-built ESIPT unit from ethyl 1, 3-dihydroxy-2-naphthoate: Estimation of excited state dipole moment and pH study, *Dyes and Pigments*, 2017, **137**, 384-394.
9. C. Prabhakar, K. Yesudas, K. Bhanuprakash, V. J. Rao, R. S. Santosh Kumar and D. N. Rao, Linear and nonlinear optical properties of mesoionic oxyallyl derivatives: enhanced non-resonant third order optical nonlinearity in croconate dyes, *The Journal of Physical Chemistry C*, 2008, **112**, 13272-13280.
10. K. Tran, G. W. Scott, D. J. Funk and D. S. Moore, Resonantly enhanced, Degenerate four-wave mixing measurement of the cubic molecular hyperpolarizability of squaraine dyes at 700 nm, *The Journal of Physical Chemistry*, 1996, **100**, 11863-11869.
11. V. Manzoni, L. Modesto-Costa, J. Del Nero, T. Andrade-Filho and R. Gester, Strong enhancement of NLO response of methyl orange dyes through solvent effects: A sequential Monte Carlo/DFT investigation, *Optical Materials*, 2019, **94**, 152-159.
12. M. Sreenath, I. H. Joe and V. Rastogi, Experimental and theoretical investigation of third-order nonlinear optical properties of azo dye 1-(2, 5-Dimethoxy-phenylazo)-naphthalen-2-ol by Z-scan technique and quantum chemical computations, *Dyes and Pigments*, 2018, **157**, 163-178.
13. D. Jayareshmi, H. M. Robert and D. Aruldas, Elucidation of the structure, spectroscopic techniques and quantum chemical investigations on nonlinear optical material 2-hydroxy-5-methylbenzaldehyde, *Journal of Molecular Structure*, 2021, **1238**, 130426.
